# Supplementary material
Source: MDPI journal article supplement (https://www.mdpi.com/2073-4433/10/9/522)

Appendix

**Figure S1.** Statistically significant contour differences in anomalously high and low diarrhoea case counts for lag 0 to 8 weeks per consecutive weeks of precipitation among individuals aged 5 years and older for season DJF.

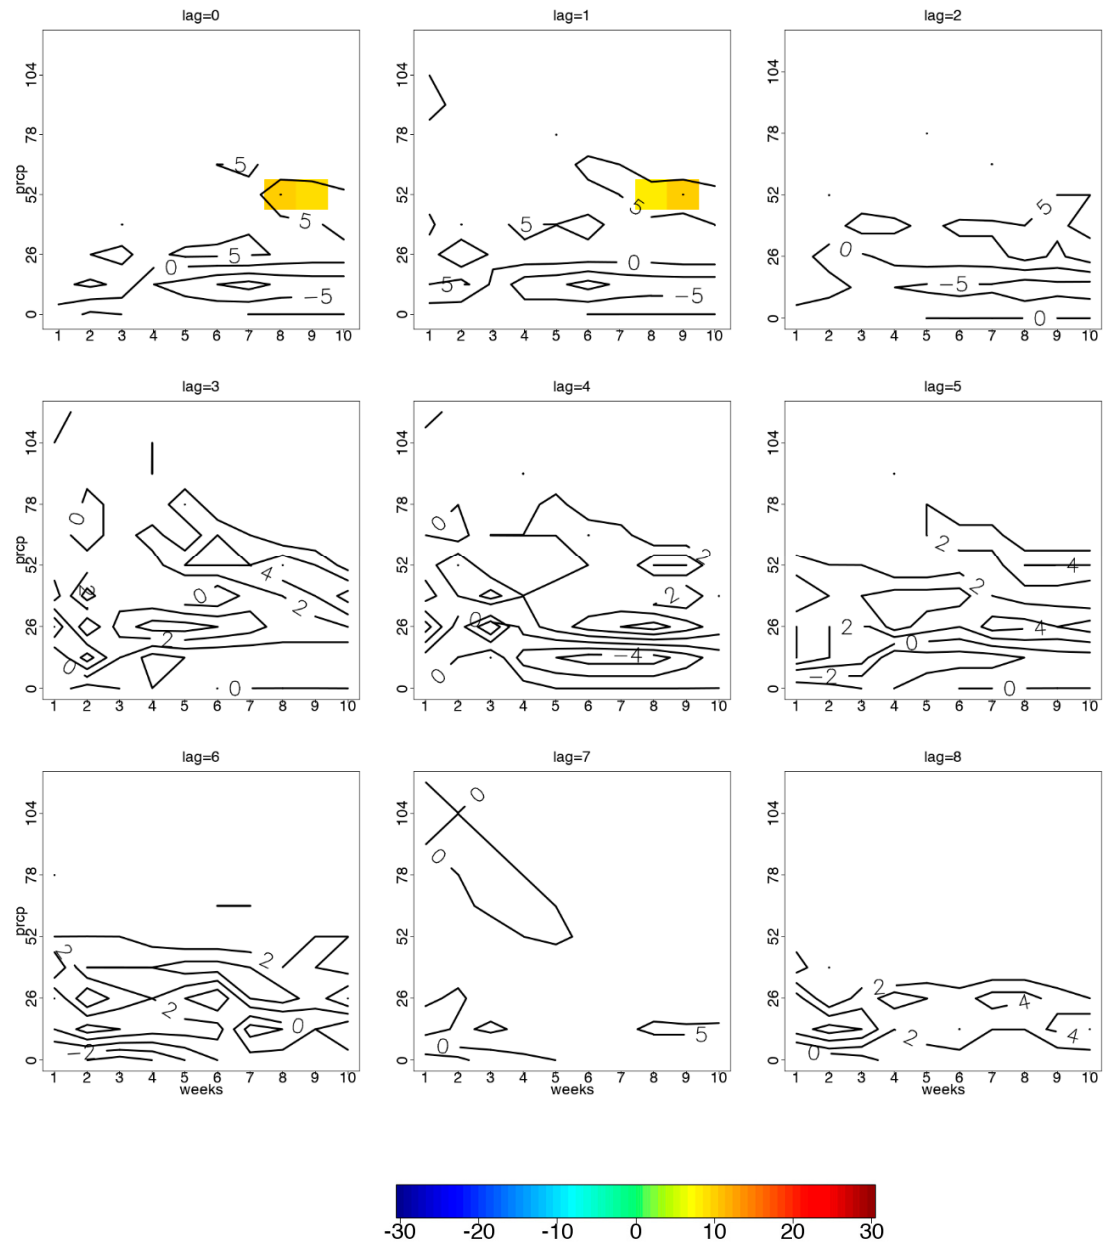

**Figure S2.** Statistically significant contour differences in anomalously high and low diarrhoea case counts for lag 0 to 8 weeks per consecutive weeks of precipitation among individuals aged 5 years and older for season MAM.

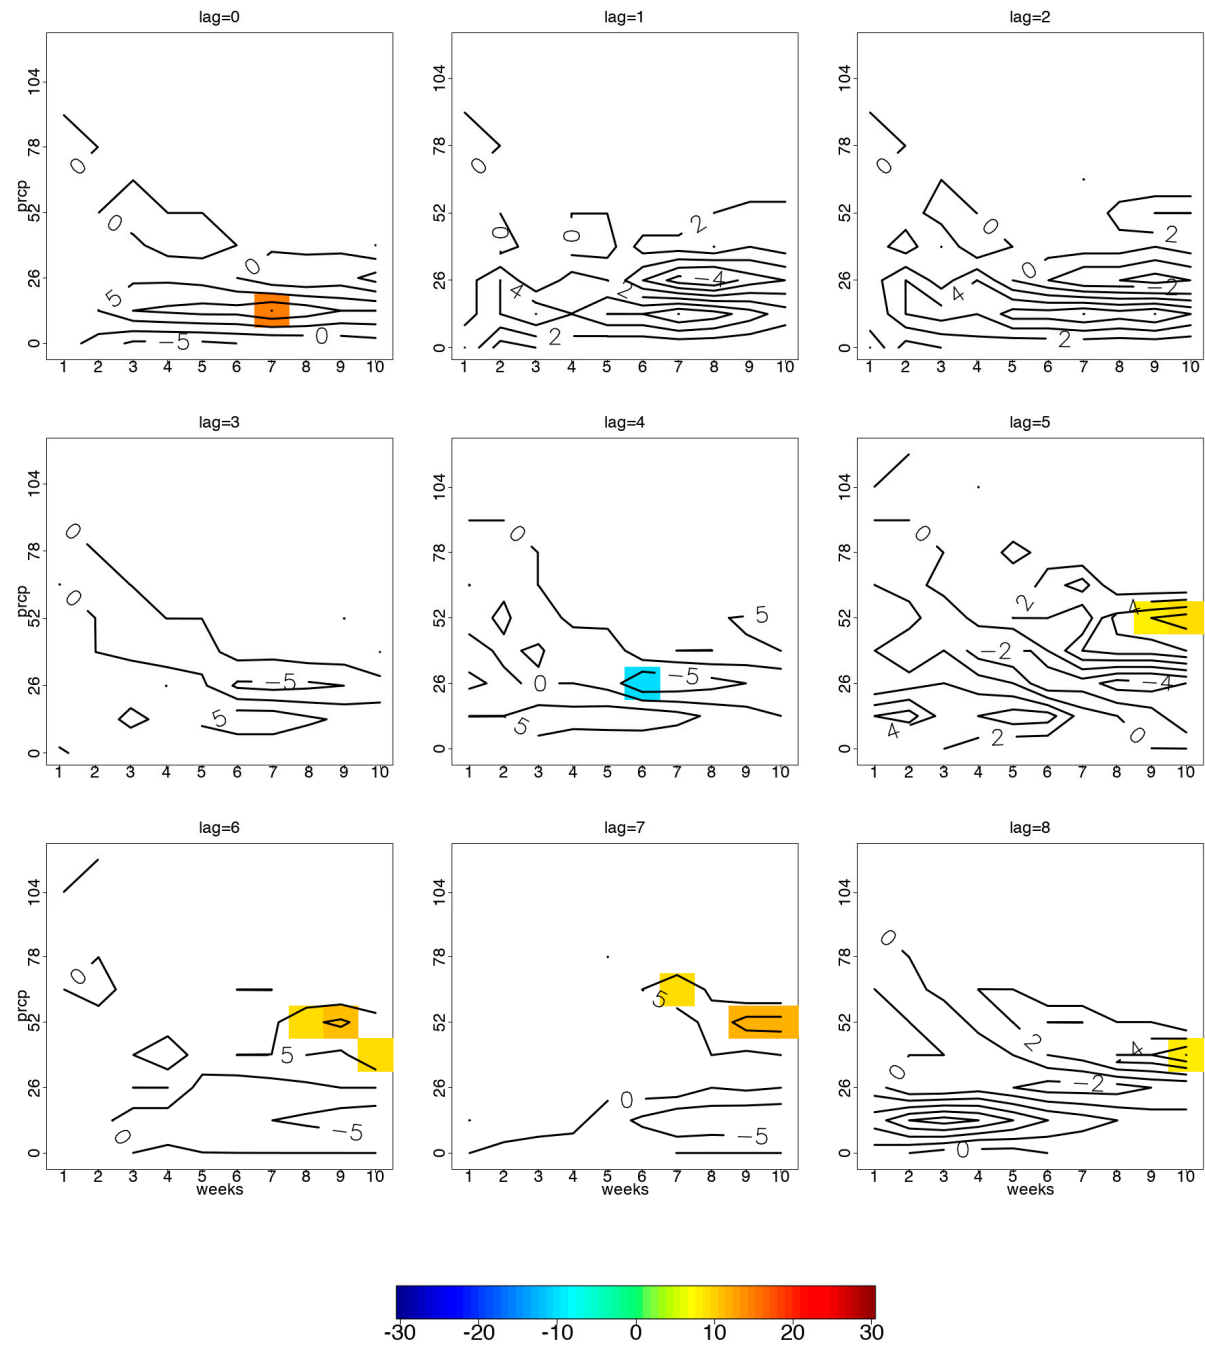

**Figure S3.** Statistically significant contour differences in anomalously high and low diarrhoea case counts for lag 0 to 8 weeks per consecutive weeks of precipitation among individuals under 5 years of age for season DJF.

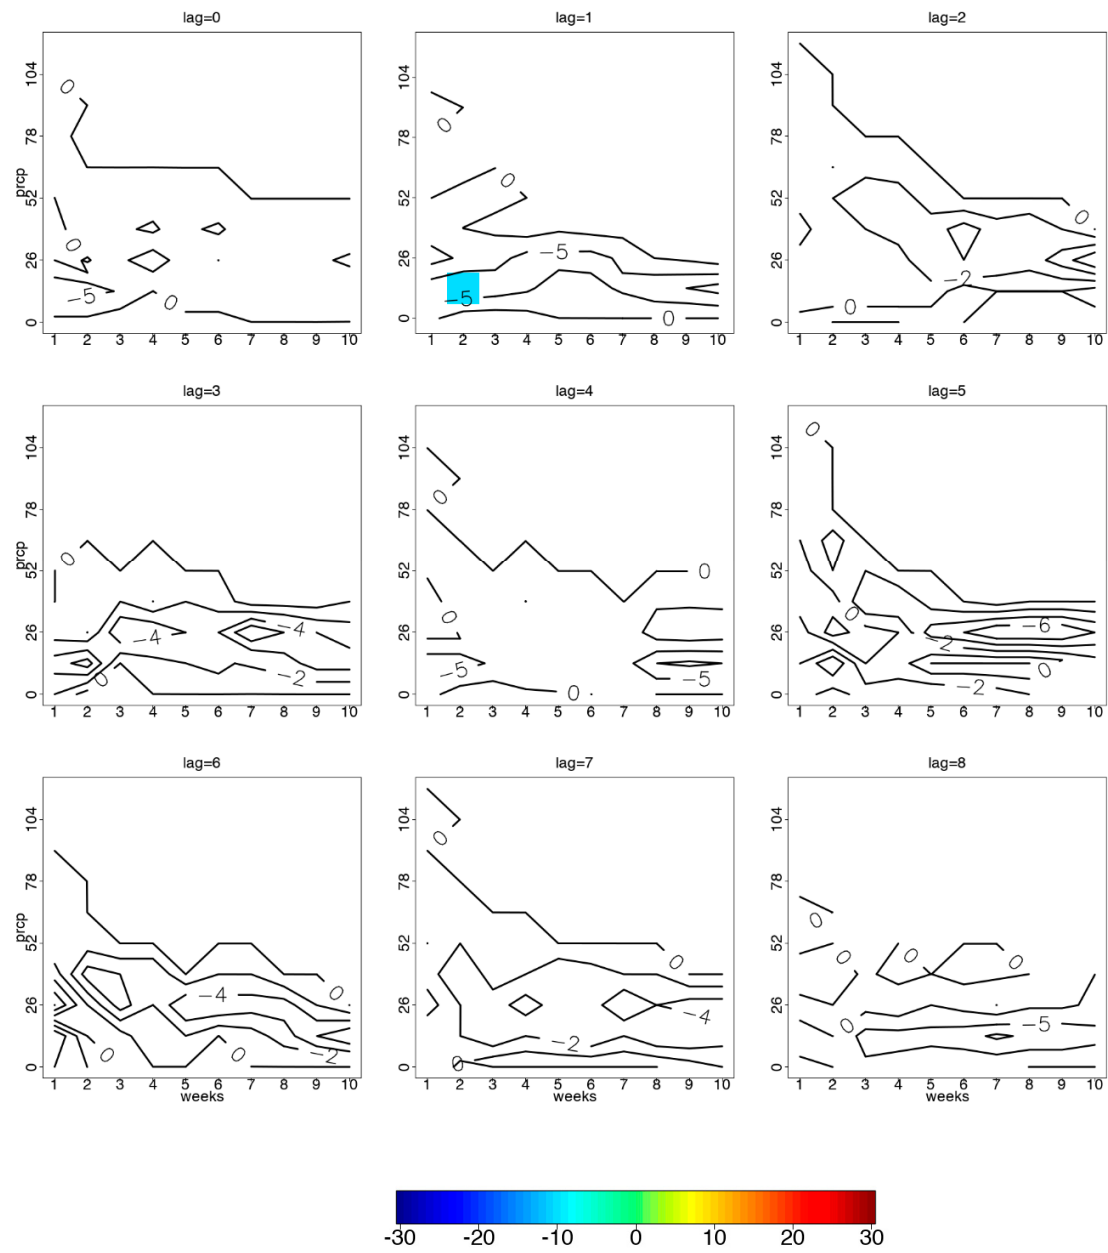

**Figure S4.** Statistically significant contour differences in anomalously high and low diarrhoea case counts for lag 0 to 8 weeks per consecutive weeks of precipitation among individuals under 5 years of age for season MAM.

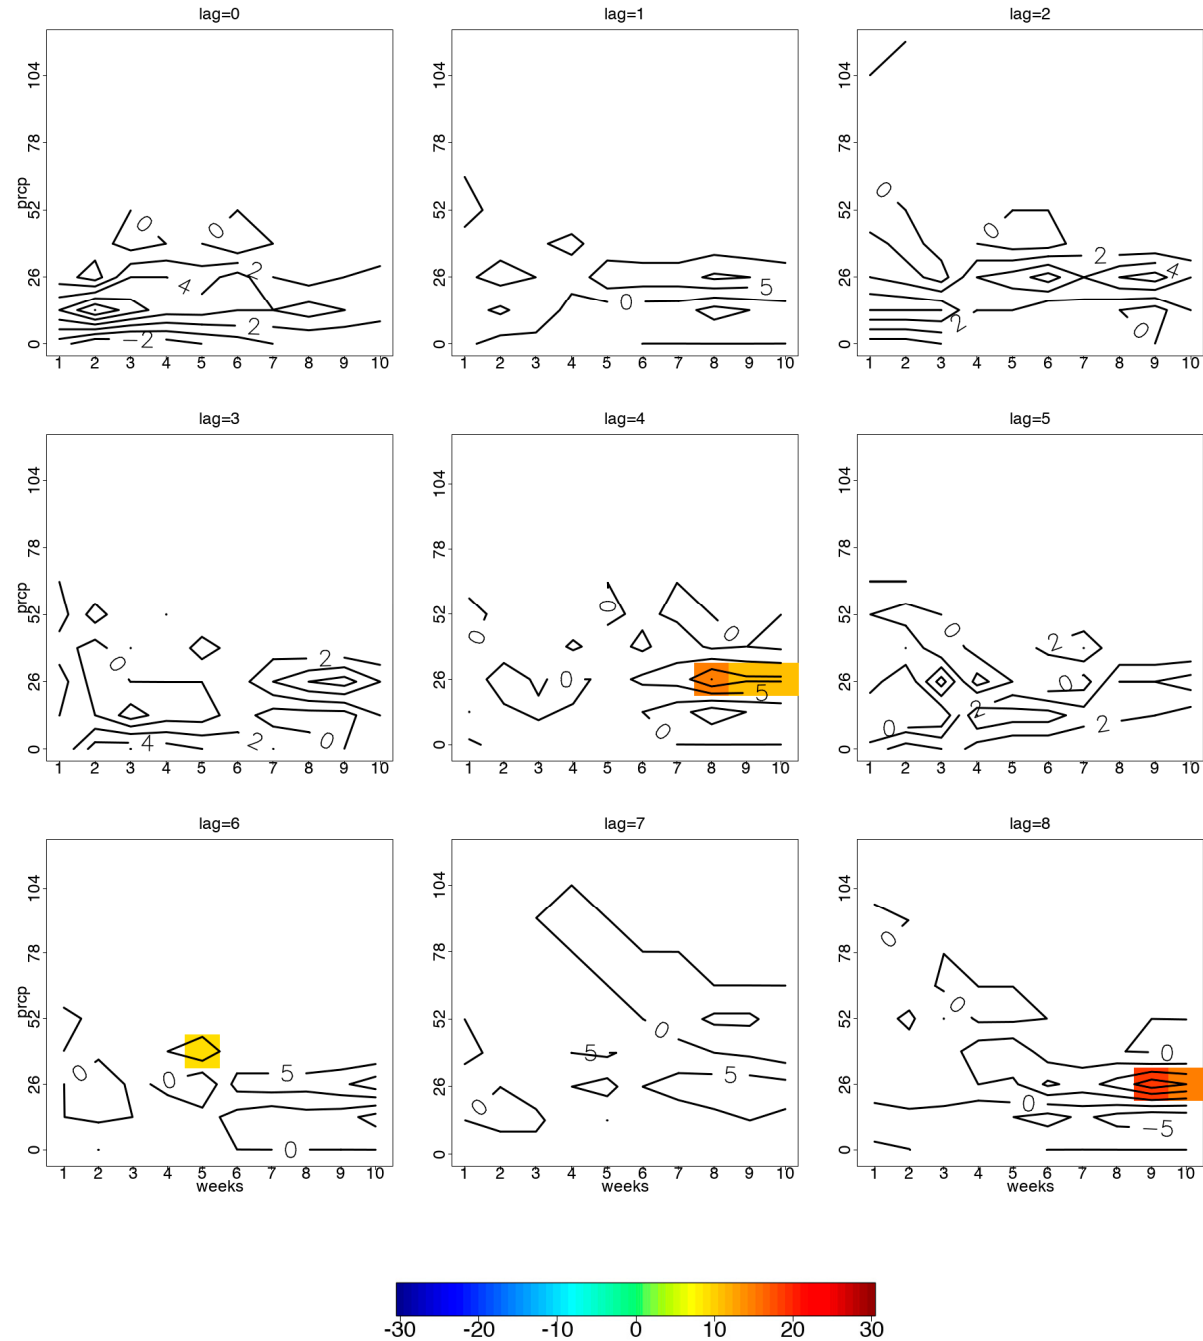

**Figure S5.** Statistically significant contour differences in anomalously high and low diarrhoea case counts for lag 0 to 8 weeks per consecutive weeks of minimum temperature among individuals under 5 years of age for season JJA.

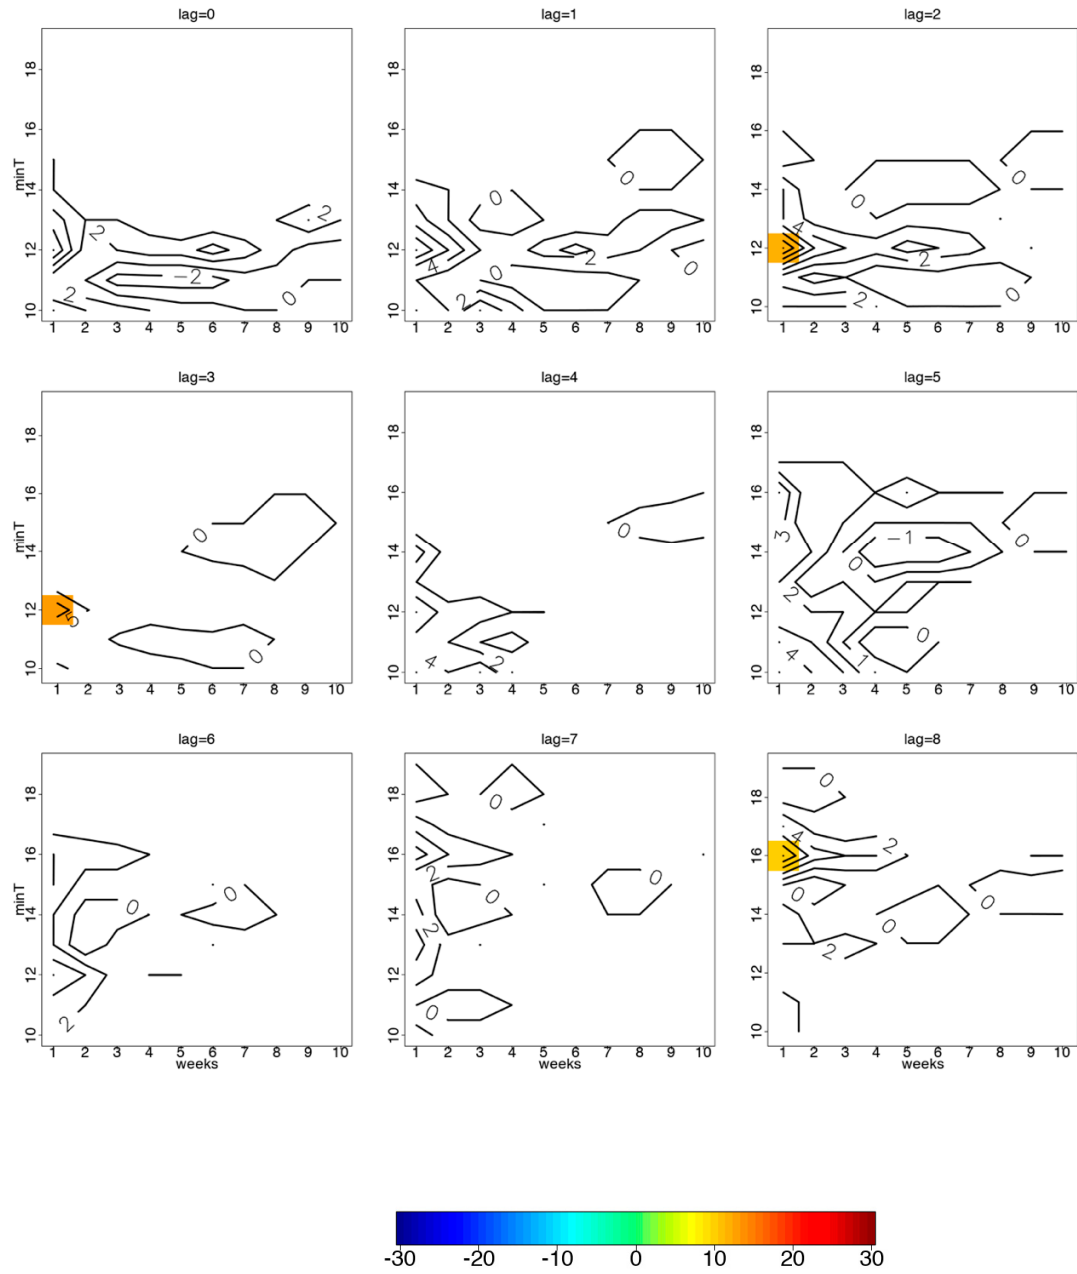

**Figure S6.** Statistically significant contour differences in anomalously high and low diarrhoea case counts for lag 0 to 8 weeks per consecutive weeks of maximum temperature among individuals under 5 years of age for season JJA.

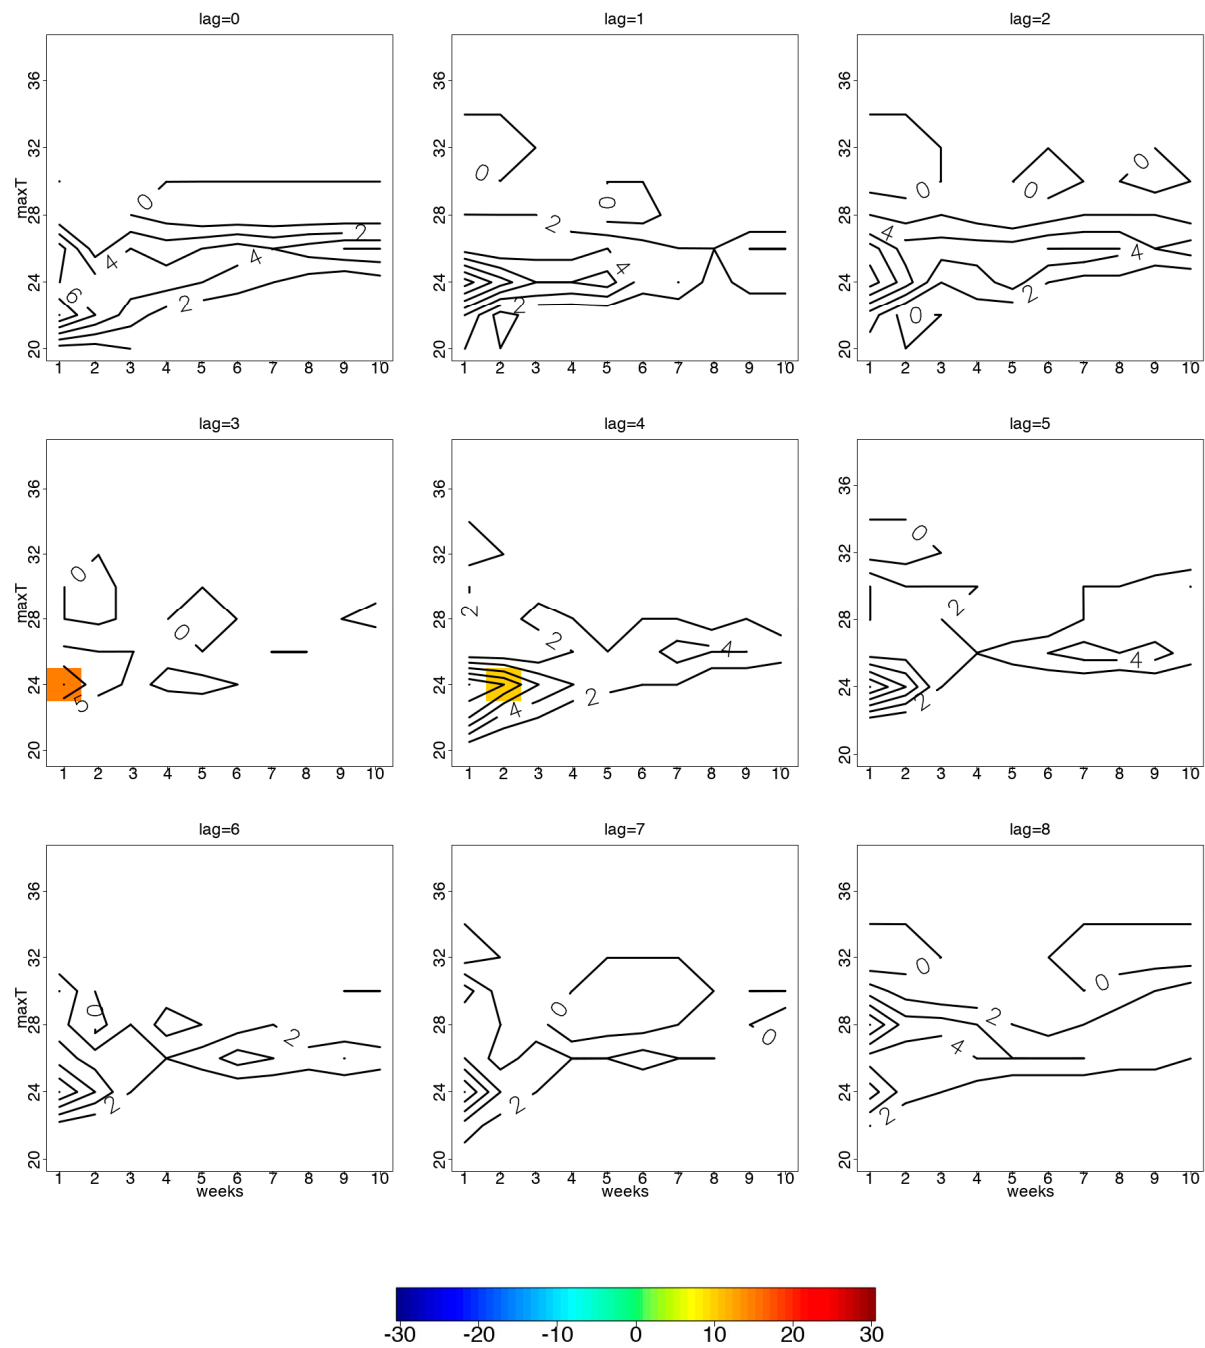

**Figure S7.** Statistically significant contour differences in anomalously high and low diarrhoea case counts for lag 0 to 8 weeks per consecutive weeks of maximum temperature among individuals under 5 years of age for season SON.

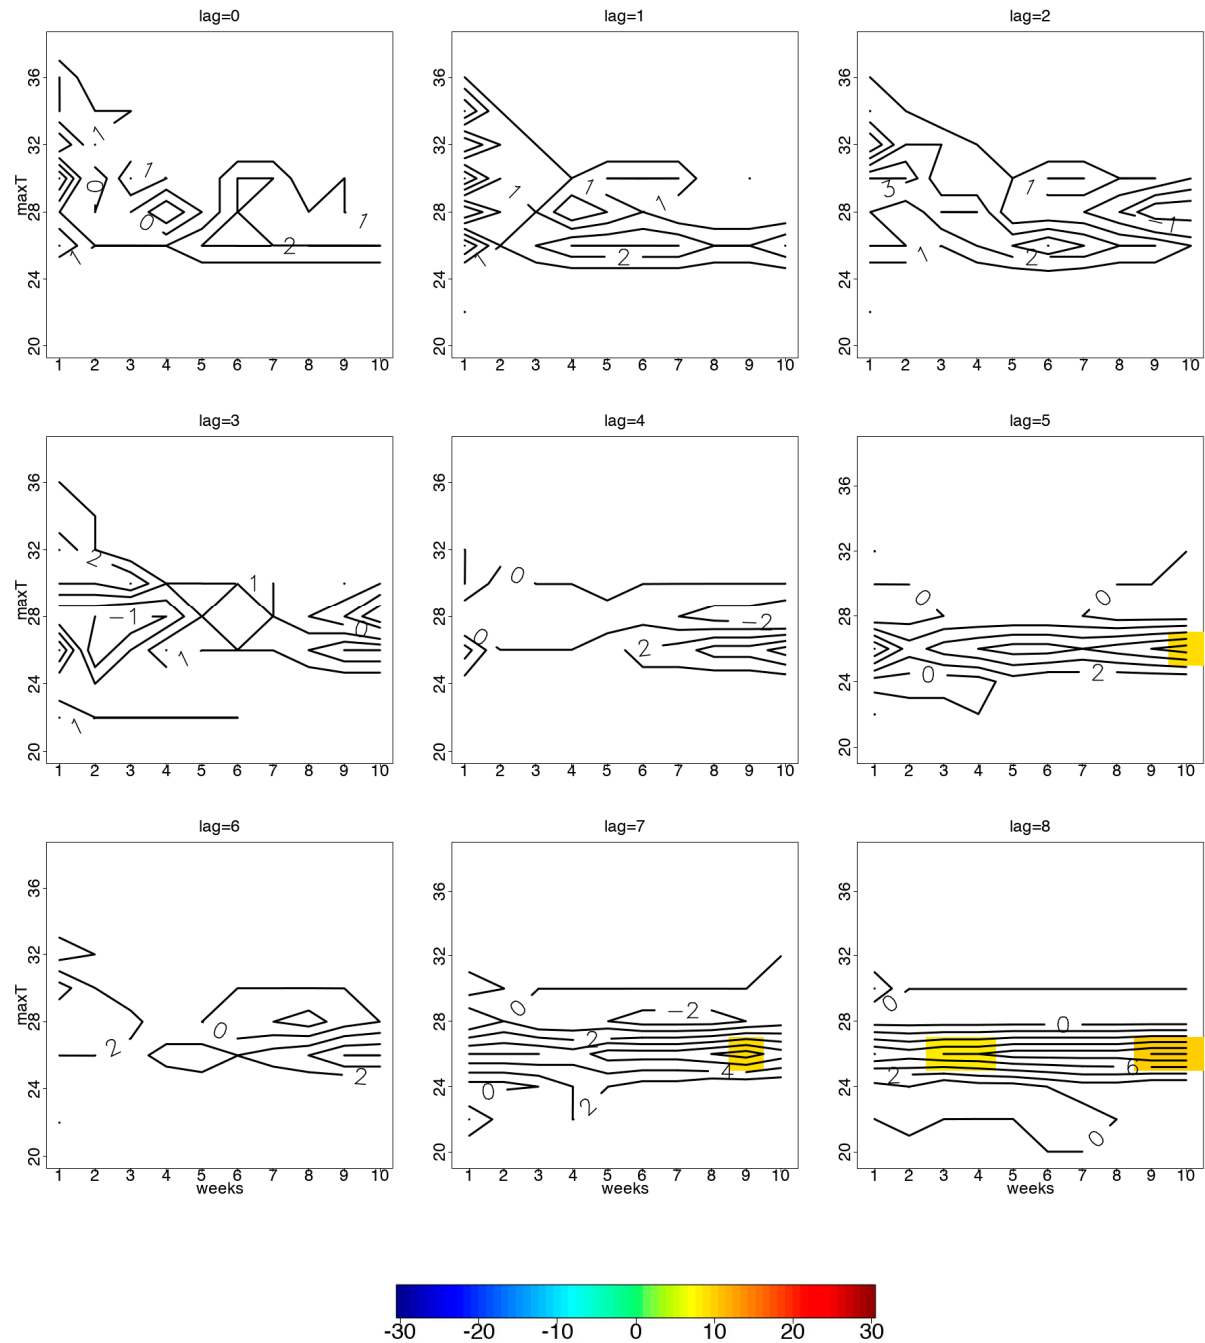

Supplement: s1 [file s1]
